# Supplementary material
Source: Springer Nature journal article supplement (https://www.springermedizin.de/resource/supplementary/12913_2013_3734_MOESM5_ESM.pdf/9532730)
Supplement: MOESM5 [file 9532730]

*Enrolment*

Invited to participate (n=538)  
(Met inclusion criteria)

Excluded (n=337)

- Non-responders (n=180)
- Declined to participate (n=135)
- Outside time-frame (n=22)

Consent &  
Randomisation 1:1

*Allocation*

Allocated to self-completed (n=93)

Allocated to researcher-completed (n=108)

*Analysis*

Analysed (n=93)

- ◆ Excluded from analysis (give reasons) (n=0)

Analysed (n= 108)

- ◆ Excluded from analysis (give reasons) (n=0)
